1 **Endogenous sugar level is associated with differential heat tolerance in**  
2 **onion bulb scales**

3

4 Ortal Galsurker<sup>1,2</sup>, Gilor Kelly<sup>3</sup>, Adi Doron-Faigenboim<sup>3</sup>, Kalaivani Aruchamy<sup>1</sup>, Bolaji  
5 Babajide Salam<sup>1,2</sup>, Paula Teper-Bamnolker<sup>1</sup>, Amnon Lers<sup>1</sup> and Dani Eshel<sup>1\*</sup>

6

7 <sup>1</sup> Department of Postharvest Science of Fresh Produce, Agricultural Research Organization  
8 (ARO), The Volcani Center, Rishon LeZion, Israel

9 <sup>2</sup> The Robert H. Smith Institute of Field Crops and Vegetables, The Hebrew University of  
10 Jerusalem, Robert H. Smith Faculty of Agriculture, Food and Environment, Rehovot, Israel

11 <sup>3</sup> Institute of Plant Sciences, ARO, The Volcani Center, Rishon LeZion, Israel

12

13 \* Correspondence: [dani@agri.gov.il](mailto:dani@agri.gov.il)

14

15 Running head: Osmolarity of onion scales determines their heat tolerance

16

17 **Highlight**

18 Hexose formation in the inner scales of onion is associated with heat tolerance, while in the  
19 outer scales, the hexoses are metabolized for onion skin formation.

20

21 **Abstract**

22 Postharvest heat treatment stimulates desiccation and browning of outer scales of onion  
23 (*Allium cepa*. L) bulb to dry papery skins. Inner scales resist the heat treatment, as evidenced  
24 by high moisture levels. During heating, inner scales showed increasing soluble sugar levels  
25 followed by higher osmolarity, vs. a dramatic decrease in both in the outer scales. Exogenous  
26 feeding of outer scales with sucrose, glucose or fructose solutions before heat treatment  
27 reduced water loss during heating, suggesting a role for soluble sugars in water retention and  
28 therefore, heat tolerance. Vacuolar invertase (VInv) is a key enzyme regulating the levels of  
29 sucrose, glucose and fructose in plant tissue. *VInv*-silencing in potato plants prevented the  
30 accumulation of reducing sugars in heated leaves, increasing water loss. In onion outer  
31 scales, VInv activity increased during heating but reducing sugars decreased, possibly due  
32 to their rapid metabolism during scale senescence to form skin. Transcriptomic analysis  
33 demonstrated upregulation of genes involved in lignin biosynthesis and secondary cell-wall  
34 formation in outer scales during heat exposure, and upregulation of genes involved in  
35 energy-related pathways in inner scales. This study reveals the dual role of soluble sugars in  
36 different onion scales, as osmoprotectants or building blocks, under heat stress.

37

38 **Key words:** heat tolerance, hexose, onion, osmolarity, sugar, transcriptome, vacuolar  
39 invertase.

40

## 41 **Introduction**

42

43 Onion (*Allium cepa* L.), a widespread Alliaceae plant, is one of the main vegetables  
44 consumed worldwide. Hot-air curing of bulbs is an important postharvest treatment, used to  
45 dry out the outer scales, which are then transformed into a complete skin. This skin protects  
46 the bulb from water loss and suppresses disease incidence, thereby maintaining higher  
47 quality during storage (Chope *et al.*, 2012; Downes *et al.*, 2009; Maw *et al.*, 2004).  
48 Application of postharvest heat treatment, 33 °C at 98% relative humidity (RH) for a few  
49 days to a few weeks, to detached outer and inner scales reveals their differential responses  
50 to the heat stress (Galsurker *et al.*, 2018). The outer scale desiccates and turns into papery  
51 dry skin, while the inner scale exhibits tolerance to the heat stress, maintaining high relative  
52 water content (RWC; Galsurker *et al.*, 2018). The mechanism responsible for these scales'  
53 differential heat response is unknown.

54 Plant tissue copes with heat stress through a series of biochemical and metabolic  
55 changes; among these is the accumulation of compatible solutes that help the plant  
56 reestablish osmotic homeostasis by increasing the water potential, protecting cellular  
57 organelles and stabilizing proteins and membranes (Hasanuzzaman *et al.*, 2013). The  
58 accumulated compatible solutes, also termed osmoprotectants, are low-molecular-weight  
59 organic solutes that are highly soluble and do not affect plant metabolism (Yancey, 2005).  
60 Several soluble sugars are considered osmoprotectants, shown to accumulate in plants in  
61 response to abiotic stresses, including high temperature, and to maintain cell homeostasis  
62 (Gepstein *et al.*, 2008; Hare *et al.*, 1998; Vinocur and Altman, 2005).

63 Onion bulbs contain fructose, glucose, sucrose and a series of fructo-  
64 oligosaccharides (fructan) as the main non-structural carbohydrates, accounting for 80% of  
65 bulb dry matter (DM; Benkeblia *et al.*, 2004; Benkeblia *et al.*, 2002; Darbyshire and Henry,  
66 1981; Darbyshire and Henry, 1979). During bulb storage, metabolic activities lead to  
67 quantitative variations in sugar composition which are strongly related to the transition from  
68 dormancy to sprouting (Benkeblia and Varoquaux, 2003; Benkeblia *et al.*, 2002). However,  
69 there are conflicting reports on the nature of the changes in soluble sugars in onion bulbs  
70 during storage. After prolonged storage, a considerable increase in the amount of fructose  
71 and glucose was reported (Chope *et al.*, 2007). In other studies, fructose levels were also  
72 reported to increase during the first month of storage but then they decreased (Benkeblia and  
73 Varoquaux, 2003; Benkeblia *et al.*, 2002). In contrast, Downes *et al.* (2010) reported a  
74 decrease in fructose level during initial storage followed by a sudden increase after 12 weeks

75 of storage. Although there are many studies describing the sugar alterations during onion  
76 bulb storage, the nature of the changes in sugar content is not yet clear and there are no  
77 reports evaluating the soluble sugar levels and their functions in different onion scales in the  
78 same bulb.

79 The main aims of this study were to assess the role of soluble sugars in the differential  
80 heat response of outer and inner onion bulb scales. We showed that high soluble sugars  
81 promote heat tolerance in the inner scale. In the outer scale, on the other hand, we found that  
82 sugars are rapidly metabolized to form skin tissue.

83

## 84 **Materials and methods**

85

### 86 *Plant materials and heat treatment*

87 Commercial brown onion cv. Orlando was grown in sandy soil in the northwestern Negev  
88 desert, Israel, in the years 2015–2017. The onions were not treated with maleic hydrazide  
89 before leaf drop, the common agricultural practice, and did not undergo field curing. Onions  
90 were harvested manually at 80–100% fallen leaves (top–down) and the leaves were removed  
91 with a sharp knife, leaving a ~5-cm long neck above the bulb, as described previously (Eshel  
92 *et al.*, 2014). Dry muddy skin was removed to expose the first scale, and bulbs were separated  
93 into different successive scales, which were numbered from the exterior to interior of the  
94 bulb as described previously (Galsurker *et al.*, 2017). The first scale represents the first outer  
95 scale which has the ability to form additional skin following heat treatment, and the fifth  
96 scale (outside in) represents an inner fleshy scale.

97 Heat treatment for the detached outer and inner scales was performed as described by  
98 Galsurker (2018). Detached scales were incubated at 33 °C under 98% RH in an incubator  
99 (Binder KBF720, Binder Instrument Co., Germany) and sampled over time. Powdered scale  
100 material was prepared by freezing the individual scales in liquid nitrogen and grinding to a  
101 fine powder using a liquid nitrogen grinder/mill (IKA, Germany). The freeze-dried  
102 powdered scales were kept at -20 °C until use.

103 Since DNA transformation is still a challenge in onion, transgenic potato leaves were  
104 used to demonstrate the wider perspective of our findings. Leaves of potato (*Solanum*  
105 *tuberosum* 'Russet Burbank' [RBK]) were harvested from previously developed vacuolar  
106 invertase (*VInv*)-silenced lines (RBK1, RBK22 and RBK46; Zhu *et al.*, 2014). The fourth

107 true leaves of same-age plants were detached simultaneously, transferred to heat treatment  
108 at 30 °C and 65% RH, and sampled over 6 days.

109

#### 110 *Osmolarity measurements*

111 To measure onion scale osmolarity, 1-cm diameter discs were punched from the first (outer)  
112 and fifth (inner) scale with a cork borer. Tissue discs were immediately frozen in liquid  
113 nitrogen and then allowed to thaw for 30 min at room temperature (RT). Thawed scales were  
114 ground and extracts were centrifuged at 13,000 g for 10 min at 4 °C; the scale cell sap was  
115 collected. The collected sap (10 µL) was used to determine osmolality using a vapor-  
116 pressure osmometer (Vapro 5500, Wescor, USA) according to the manufacturer's  
117 instructions. To measure potato leaf osmolarity, 0.5 g of leaf was placed in a 50-mL tube,  
118 then immediately dropped into liquid nitrogen and stored at -80 °C until sap extraction.  
119 Frozen leaves were loaded into a 10-mL syringe covered with a filter-paper disc and thawed  
120 at RT. Thawed leaves were centrifuged at 1,500 g for 10 min at 4 °C and leaf sap was  
121 collected to determine the osmolarity as described above.

122

#### 123 *Extraction and quantification of sugars*

124 Powdered scale material (150 mg DW) and potato leaves (0.5 g FW) were heated three times  
125 with 80% ethanol at 80 °C, for 45 min each time, and the ethanolic solutions were pooled  
126 and dried using a speed vacuum (Centrivap Concentrator, Labconco, USA). Pellet was  
127 dissolved in 2 ml DDW and passed through a 0.2-µm membrane filter (Millex-GV Filter  
128 Unit, Merck Millipore, Ireland). The filtrate was used for sucrose, glucose and fructose  
129 analysis by ultrafast LC (LC-10A UFLC series, Shimadzu, Japan) equipped with a refractive  
130 index detector (SPD-20A) and analytical ion-exchange column (6.5 x 300 nm; Sugar-Pak I,  
131 Waters). Column temperature was set to 80 °C and ultrapure water (Bio Lab, Israel) was  
132 used as the mobile phase, at a flow rate of 0.5 mL min<sup>-1</sup>. Sugars were identified and  
133 quantified by a calibration curve created using standards of sucrose, glucose and fructose.  
134 The chromatographic peak corresponding to each sugar was identified by comparing the  
135 retention time with that of the standard. The calibration curve was used to determine the  
136 relationship between the peak area and concentration of the sugars.

137

#### 138 *Exogenous feeding of sugars to outer scales*

139 Detached outer scales were surface-sterilized with 0.1% (v/v) sodium hypochlorite and  
140 0.02% (v/v) Tween 20 for 5 min, followed by washing with sterile water for 10 min. The  
141 outer scales were then dried for 5 min and placed in a 500-mL sterile beaker containing 0,  
142 100, 300 or 600 mM sucrose, glucose or fructose solutions, and incubated at 14 °C in the  
143 dark for 24 h. After incubation, outer scales were carefully rinsed with sterile water for 5  
144 min and exposed to heat treatment as described above, for 6 days. Scales were sampled daily  
145 during the heating for osmolarity and water-loss measurements.

146

#### 147 *Relative water content*

148 Water loss from the exposed scale was determined by measuring RWC during the heat  
149 treatment, as described by Galsurker (2018). The heated detached scales were sampled as  
150 follows: six 2-cm diameter discs were punched from each scale with a cork borer and  
151 weighed for initial FW. The discs were then soaked in distilled water for 24 h at RT, and  
152 carefully blotted dry with tissue paper to determine their saturated weight (SW). The discs  
153 were then dried in an oven at 70 °C for at least 24 h to measure the DW. RWC was calculated  
154 as:

$$155 \quad \text{RWC (\%)} = \frac{(\text{FW} - \text{DW}) \times 100}{(\text{SW} - \text{DW})} \quad (1)$$

156

#### 158 *Enzyme extraction and activity measurements*

159 VInv activity was measured as described previously (Miron and Schaffer, 1991), with minor  
160 modifications. Outer and inner powdered scale material (1 g DW) was dissolved in 5 mL  
161 extraction buffer containing 25 mM HEPES-NaOH, 7 mM MgCl<sub>2</sub>, 0.5 mM EDTA, 3 mM  
162 DTT, and 2 mM diethyldithiocarbamic acid, pH 7.5. After centrifugation at 18,000 g for 30  
163 min, the supernatant was dialyzed overnight against 25 mM HEPES-NaOH and 0.25 mM  
164 EDTA, pH 7.5, and used as a crude extract. VInv activity was measured by incubation of 0.3  
165 mL of 0.1 M citrate/phosphate buffer (pH 5.0), 0.1 mL crude extract and 0.1 mL of 0.1 M  
166 sucrose. After 1 h incubation at 37 °C, glucose liberated from the hydrolysis of sucrose was  
167 quantified by adding 500 µL Sumner's reagent (3,5-dinitrosalicylic acid) and immediately  
168 transferring the sample to heating at 100 °C for 10 min to terminate the reaction. The sample  
169 was then chilled at 4 °C (Sumner and Graham, 1921). The reduction of dinitrosalicylic acid  
170 to 3-amino-5-nitrosalicylic acid by glucose was measured as absorbance at 550 nm using a

171 spectrophotometer. Quantitation of glucose in each sample was based on glucose standards.  
172 VInv activity was expressed as nmol glucose formed g DW<sup>-1</sup> min<sup>-1</sup>.

173

## 174 **Results**

175

### 176 *Heat treatment induces different osmolarity profiles in outer vs. inner scales*

177 Our previous study showed that the first outer onion scale dramatically desiccates via loss  
178 of RWC during heat treatment, while the fifth inner scales maintain their RWC and are thus  
179 termed heat tolerant (Galsurker *et al.*, 2018). To determine the factors that might be involved  
180 in the differential heat response, detached outer and inner onion scales were heated at 33 °C  
181 and 98% RH and their osmolarity measured over 6 days. Differential osmolarity levels were  
182 found between outer and inner scales during the treatment. The inner scale revealed a high  
183 osmolarity level that increased slightly from 455 to 528 mosmol kg<sup>-1</sup> during the first 2 days  
184 of heating and then stabilized until day 6 (Fig. 1A). In contrast, the osmolarity of the outer  
185 scale, which initially had lower levels of 409 mosmol kg<sup>-1</sup>, decreased gradually to 276  
186 mosmol kg<sup>-1</sup> during the 6 days of heat treatment, suggesting that outer scale desiccation is  
187 associated with a decline in osmolarity level (Fig. 1A).

188

### 189 *The inner scale maintains high levels of soluble sugars under heat treatment*

190 Our previous data suggested that heat treatment of outer and inner scales induces the  
191 differential expression of various genes, including those related to sugar metabolism  
192 (Galsurker *et al.*, 2018). To test whether soluble sugars contribute to the different osmolarity  
193 levels observed between the inner and outer scales, we quantified sucrose, glucose and  
194 fructose levels during the heat treatment. Significant differences in total soluble sugars  
195 between inner and outer scales were already observed at the 0 time point, which became  
196 more significant following 2, 4 and 6 days of heating. The inner heated scale showed higher  
197 initial levels of glucose, fructose and sucrose and a slight increase in the levels of these  
198 sugars during the 6 days of heating (Fig. 1B–D). The outer scale showed a decrease in all  
199 three soluble sugars' levels, especially in the first 2 days of heating (Fig. 1B–D). The  
200 contents of the hexoses glucose and fructose decreased dramatically in the outer scale (Fig.  
201 1C, D). The association between the soluble sugar and osmolarity profiles of the onion scales  
202 and the desiccation of the outer scale suggested a role for sugar metabolism in heat  
203 susceptibility.

204

205 *Exogenous sugar feeding induces higher osmolarity levels and heat tolerance*

206 We hypothesized that soluble sugar content directly contributes to the observed increase in  
207 osmolarity and reduced water loss in the inner scale tissue during exposure to heat. We tested  
208 this hypothesis by feeding outer scales with a solution containing glucose, fructose, or  
209 sucrose and followed the consequences on osmolarity and water loss. Detached outer scales  
210 were immersed in 100, 300 and 600 mM solutions of glucose, fructose or sucrose, and  
211 incubated in the dark at 14 °C for 24 h. To detect sugar penetration into the scale tissue, we  
212 quantified its level after sugar feeding, prior to the heat treatment. Higher levels of sugars  
213 were found in the outer scales that were fed with sugars compared to the non-fed controls,  
214 demonstrating that the three sugars could penetrate the scale (Supplementary Fig. S1). After  
215 sugar feeding, the scales were exposed to heat treatment for 6 days. Glucose, fructose and  
216 sucrose feeding only increased osmolarity at the higher doses of 300 and 600 mM, with no  
217 significant differences among sugars (Supplementary Fig. S2). During heating, the scales  
218 that were fed sugars maintained high osmolarity levels, while osmolarity decreased in the  
219 non-fed scales (Fig. 2A). Scales that were fed with any of the three sugars retained high  
220 RWC values, between 85 and 90%, compared to the non-fed scales that showed an average  
221 82% RWC after 6 days of heat treatment (Fig. 2B). This experiment suggested that elevated  
222 sugar content reduces outer scale desiccation through an increase in tissue osmolarity.

223

224 *VInv silencing increases susceptibility to heat*

225 VInv is a key enzyme responsible for the level of sucrose and its hydrolysis products, glucose  
226 and fructose. Silencing of VInv in potato plants results in effective prevention of sucrose  
227 degradation (Bhaskar *et al.*, 2010; Salam *et al.*, 2017). To study the possible involvement of  
228 osmolarity, as affected by soluble sugar content, on heat tolerance of plant tissue, we used  
229 three independent VInv-silenced lines of RBK potato (Zhu *et al.*, 2016; Zhu *et al.*, 2014).  
230 Leaves from these lines have reduced levels of glucose and fructose (Zhu *et al.*, 2014).  
231 During 8 days of heat treatment (30 °C at 65% RH), leaves of the three VInv-silenced lines—  
232 RBK1, RBK22 and RBK46—lost more water than the wild-type (WT) leaves (Fig. 3). The  
233 levels of all three soluble sugars decreased in the three VInv-silenced RBK lines during the  
234 heat treatment. A different sugar profile was found in the WT, where the sucrose levels  
235 decreased and the hexose levels increased during heating (Fig. 3B). This result fit with the  
236 expected activity of VInv that cleaves sucrose and increases the level of hexoses in  
237 association with higher tolerance to heat.



238

239 *Heat treatment induces accumulation of VInv activity only in the outer scale*

240 We hypothesized that sugar metabolism in the onion scale contributes to the increase in  
241 osmolarity, similar to the effect of sugar feeding (shown in Fig. 2). As supported by the  
242 consequences of *VInv* silencing in potato leaves, this enzyme may play a role in determining  
243 sugar levels and consequently, water loss during heat stress. We examined possible *VInv*  
244 involvement in the heat response in onion as well, by measuring the changes in enzyme  
245 activity during heat treatment in the outer and inner scales. Surprisingly, after 8 days of heat  
246 treatment, *VInv* activity had increased dramatically in the outer scale, whereas in the inner  
247 scale, it remained constant (Fig. 4A). The two peaks of *VInv* activity observed in the outer  
248 scale during the heat treatment (Fig. 4A) suggested a partial inhibitory effect caused by the  
249 accumulation of hexoses, as suggested by Kim et al. (2000). However, these results did not  
250 fit with the measured changes in soluble sugar levels in the outer and inner scales during the  
251 heat treatment (Fig. 1). One possibility for this discrepancy is that the reduction in hexose  
252 content observed in the outer scales, even as *VInv* activity increases, is related to hexose  
253 recruitment for DM synthesis in the drying outer scale tissue.

254 To examine this possibility, DM content was compared between the outer and inner  
255 scales during prolonged heat treatment, and the profiles were markedly different. In the outer  
256 scale, a gradual increase in DM contents, from 11% to 75%, was measured during 22 days  
257 of heating, which eventually resulted in skin formation, whereas the inner scales maintained  
258 a constant DM content of about 11% (Fig. 4B). The increase in DM content in the outer scale  
259 was probably a result of higher cell-wall development during scale desiccation and skin  
260 formation. Cellulose and lignin are two of the major components of the secondary cell wall,  
261 serving as barriers against pathogen colonization of plant tissue (Miedes *et al.*, 2014). We  
262 reasoned that upregulation of genes related to the biosynthesis of cellulose and lignin would  
263 be positively correlated with skin formation in the outer scale and the observed increase in  
264 DM.

265 Analysis of our heat treatment transcriptome data (Galsurker *et al.*, 2018) showed  
266 upregulation of several genes involved in lignin biosynthesis and secondary cell-wall  
267 formation in the outer scale (Fig. 5A, B; Supplementary Table S1). These results suggest  
268 that the soluble sugars in the outer scales are used as building blocks for the synthesis of  
269 structural carbohydrates, and thus their levels decrease as part of outer skin development.

270 The inner scale showed heat resistance and maintenance of viability. Genes involved  
271 in energy-related pathways, such as glycolysis and the tricarboxylic acid (TCA) cycle, were

272 upregulated in the inner scale during the heat treatment (Fig. 5C, D). After glycolysis, the  
273 respiratory mechanism continues with the TCA-cycle reactions. The pyruvate produced in  
274 glycolysis can be transported to the mitochondria where it is oxidized to acetyl-CoA and  
275 CO<sub>2</sub> by pyruvate dehydrogenase (Werner *et al.*, 2011). In the inner scale, genes involved in  
276 the TCA cycle were significantly induced following the heat treatment, and were highly  
277 expressed compared to the levels measured in the outer scale (Fig. 5D).

278

## 279 **Discussion**

280

### 281 *A high level of soluble sugars promotes heat tolerance in the inner scale*

282 Only outer scales of onion can form dry brown skin during heat stress, while the inner scales  
283 maintain high water content and do not change color (Galsurker *et al.*, 2018). During heating,  
284 osmolarity and hexose levels were reduced in the outer scale, and were stable in the inner  
285 one, suggesting their possible involvement in maintaining the osmotic pressure of internal  
286 onion scales (Fig. 1). Such high osmotic pressure could have a role in the heat tolerance of  
287 the inner scales. The high level of osmolarity in the inner scale could be achieved through  
288 the accumulation and/or maintenance of the three soluble sugars, glucose, fructose and  
289 sucrose, during heating (Fig. 1). Soluble sugar accumulation has been confirmed to play an  
290 important role in enhancing plant tolerance to heat stress (Hasanuzzaman *et al.*, 2013).  
291 Soluble sugars such as glucose, sucrose, fructose and trehalose function as osmoprotectants  
292 by regulating the osmotic adjustment, provide membrane protection, and scavenge the toxic  
293 reactive oxygen species (ROS) formed under various kinds of stresses (Keunen *et al.*, 2013;  
294 Singh *et al.*, 2015). Furthermore, soluble sugars have been reported to participate in the  
295 reduction of oxidative damage, partly as a result of activation of specific ROS-scavenging  
296 systems (Ramel *et al.*, 2009).

297 Exogenous supply of individual soluble sugars—glucose, fructose or sucrose—to the  
298 outer scale led to an increase in its osmolarity and therefore, to a reduction in water loss  
299 following heat treatment (Fig. 2), supporting the role of these soluble sugars in osmotic  
300 adjustment and heat tolerance. In other studies, exogenous application of glucose during salt  
301 stress of wheat seedlings increased DW, maintained ionic homeostasis, induced proline  
302 accumulation, prevented water loss and activated antioxidant enzymes (Hu *et al.*, 2012). In  
303 rice, glucose and fructose functioned as osmoprotectants and free-radical scavengers under  
304 salinity stress (Pattanagul and Thitisaksakul, 2008). Furthermore, soluble sugars are  
305 associated with ROS anabolism and catabolism, such as the oxidative pentose phosphate

306 pathway involved in ROS scavenging (reviewed by Couée *et al.*, 2006). In higher plants, a  
307 diverse variety of soluble sugars, such as glucose, sucrose, fructose, raffinose and stachyose  
308 are known to provide freezing tolerance (Yuanyuan *et al.*, 2009). These sugars not only act  
309 as osmoprotectants but also protect membranes by allowing adaptation to drought or chilling  
310 stress through their interaction with the lipid bilayer (Garg *et al.*, 2002). Our experiments  
311 using *VInv*-silenced potato plants showed a decline in reducing sugar content compared to  
312 the WT, which increased their susceptibility to heat stress and elevated water loss in their  
313 leaves under heat treatment (Fig. 3). These results also support a role for soluble sugars as  
314 contributors to osmotic adjustment, thereby promoting heat tolerance in other plant tissues.

315

### 316 *Outer scale sugars are rapidly metabolized during heating*

317 In contrast to the inner scale that maintains high osmolarity, possibly as a result of retaining  
318 high levels of soluble sugars, in the outer scale, both osmolarity and hexose levels decreased  
319 significantly in response to heat treatment (Fig. 1). Lower levels of hexoses were found to  
320 be associated with a higher level of *VInv* activity, and with increasing DM content in the  
321 outer scale under heating (Fig. 4). These results might be explained by rapid metabolism of  
322 the hexoses in the outer scale as part of its senescence process. Sugars can act as nutrients as  
323 well as regulators of metabolism, growth, stress responses and developmental senescence  
324 (O'hara *et al.*, 2013; Rolland *et al.*, 2006; Rolland *et al.*, 2002). The older outer scale, a  
325 distressed suicide tissue, is programmed to senesce, die and form skin (Galsurker *et al.*,  
326 2017), and all of these process are accelerated by heat treatment. DM content has been  
327 previously reported to be correlated with structural carbohydrates in onion scales (Jaime *et*  
328 *al.*, 2002). It is possible that sugars in the outer scales are metabolized in processes that result  
329 in the synthesis of structural carbohydrates, such as secondary cell-wall components.  
330 Various genes associated with secondary cell-wall development were overrepresented in the  
331 transcriptome of the outer scale following the heat treatment compared to the inner scales,  
332 mainly genes related to lignin and cellulose biosynthesis (Fig. 5). To the best of our  
333 knowledge, there are no studies describing the secondary cell-wall development pathway  
334 during onion skin formation. However, studies have shown the role of secondary cell-wall  
335 development in other protective dry tissues, such as the seed coat. Thickening of the  
336 secondary cell wall has been found in seed-coat formation in *Arabidopsis* and *Brassica*  
337 *napus* (Haughn and Chaudhury, 2005; Jiang and Deyholos, 2010).

338

## 339 **Conclusions**

340

341 The differential response of detached outer and inner bulb scales to heat stress suggests the  
342 activation of different cascades of events leading to skin formation and viable heat  
343 resistance, respectively (Fig. 6). While the inner scales maintained high osmolarity, DM and  
344 sugar levels, all of these factors were dramatically reduced in the outer scales. In both onion  
345 scales and potato leaves, high osmolarity, caused by a high level of soluble sugars in the  
346 plant tissue, inhibited water loss. The transcriptome analysis in this study led to a putative  
347 model for the differential heat responses of the outer and inner scales (Fig. 6). The model  
348 suggests that the inner scales express heat tolerance, as compared to the heat susceptibility  
349 of the outer scale that results in browning and skin development (Fig. 6). This differential  
350 response can be explained by the different physiological ages of the scales, with older ones  
351 on the outside and younger ones toward the inside (Brewster, 2008; Galsurker *et al.*, 2017).  
352 The different biological processes suggested to occur by our study in the inner and outer  
353 scales are probably related to their different functions. Outer skins protect the bulb against  
354 disease by providing both physical and biochemical barriers to pathogens (Eshel *et al.*,  
355 2014; Mishra *et al.*, 2014). Upregulation of genes related to lignin and cellulose synthesis in  
356 the outer scales, as shown in our transcriptome, represent the cascade that leads to the  
357 formation of the biochemical barrier and later, programmed cell death that leads to skin  
358 formation (Galsurker *et al.*, 2017). In contrast, heat tolerance of the inner scales is associated  
359 with higher expression of genes related to glycolysis and the TCA cycle, representing a  
360 valuable resource for the identification of candidate heat-tolerant genes, thus providing  
361 important information on the mechanisms underlying heat tolerance.

362

363

## Supplementary data

**Table S1.** Gene abbreviations and their full names; presented according to the functional groups in Fig. 5.

**Fig. S1.** Sugar feeding induces a higher level of sugar in onion scale tissue. Outer scales were incubated in 600 mM glucose, fructose or sucrose solution for 24 h at 14 °C. Data are averages of three experiments, each performed with five replicates. Error bars represent SE.

**Fig. S2.** Sugar feeding induces higher osmolarity levels in a dose-dependent manner in the outer scale. Data are means  $\pm$  SE of six repeats; each repeat contained four detached scales.

## Acknowledgements

This research was funded by a grant from the Chief Scientist of the Ministry of Agriculture and Rural Development of Israel (no. 430-0416-13). We thank Prof. Jiming Jiang for allowing us to work with the RBK transgenic lines. We thank Prof. Menachem Moshelion for fruitful discussions.

## References

- Benkeblia N, Onodera S, Yoshihira T, Kosaka S, Shiomi N.** 2004. Effect of temperature on soluble invertase activity, and glucose, fructose and sucrose status of onion bulbs (*Allium cepa*) in store. *International journal of food sciences and nutrition* **55**, 325-331.
- Benkeblia N, Varoquaux P.** 2003. Effect of nitrous oxide (N<sub>2</sub>O) on respiration rate, soluble sugars and quality attributes of onion bulbs *Allium cepa* cv. *Rouge Amposta* during storage. *Postharvest biology and technology* **30**, 161-168.
- Benkeblia N, Varoquaux P, Shiomi N, Sakai H.** 2002. Effect of irradiation, MH and CIP treatments on respiration rate and oligosaccharides variations in onion bulbs in store. *International journal of food science & technology* **37**, 169-176.
- Bhaskar PB, Wu L, Busse JS, Whitty BR, Hamernik AJ, Jansky SH, Buell CR, Bethke PC, Jiang J.** 2010. Suppression of the vacuolar invertase gene prevents cold-induced sweetening in potato. *Plant Physiology* **154**, 939-948.

- Chope GA, Cools K, Hammond JP, Thompson AJ, Terry LA.** 2012. Physiological, biochemical and transcriptional analysis of onion bulbs during storage. *Annals of Botany* **109**, 819-831.
- Couée I, Sulmon C, Gouesbet G, El Amrani A.** 2006. Involvement of soluble sugars in reactive oxygen species balance and responses to oxidative stress in plants. *Journal of Experimental Botany* **57**, 449-459.
- Darbyshire B, Henry R.** 1981. Differences in fructan content and synthesis in some *Allium* species. *New Phytologist* **87**, 249-256.
- Darbyshire B, Henry RJ.** 1979. The association of fructans with high percentage dry weight in onion cultivars suitable for dehydrating. *Journal of the Science of Food and Agriculture* **30**, 1035-1038.
- Downes K, Chope GA, Terry LA.** 2009. Effect of curing at different temperatures on biochemical composition of onion (*Allium cepa* L.) skin from three freshly cured and cold stored UK-grown onion cultivars. *Postharvest biology and technology* **54**, 80-86.
- Downes K, Chope GA, Terry LA.** 2010. Postharvest application of ethylene and 1-methylcyclopropene either before or after curing affects onion (*Allium cepa* L.) bulb quality during long term cold storage. *Postharvest biology and technology* **55**, 36-44.
- Eshel D, Teper-Bamnlker P, Vinokur Y, Saad I, Zutahy Y, Rodov V.** 2014. Fast curing: A method to improve postharvest quality of onions in hot climate harvest. *Postharvest biology and technology* **88**, 34-39.
- Galsurker O, Doron-Faigenboim A, Teper-Bamnlker P, Daus A, Fridman Y, Lers A, Eshel D.** 2017. Cellular and molecular changes associated with onion skin formation suggest involvement of programmed cell death. *Frontiers in plant science* **7**, 2031.
- Galsurker O, Doron-Faigenboim A, Teper-Bamnlker P, Daus A, Lers A, Eshel D.** 2018. Differential response to heat stress in outer and inner onion bulb scales *Journal of Experimental Botany*, ery189.
- Garg AK, Kim J-K, Owens TG, Ranwala AP, Do Choi Y, Kochian LV, Wu RJ.** 2002. Trehalose accumulation in rice plants confers high tolerance levels to different abiotic stresses. *Proceedings of the National Academy of Sciences* **99**, 15898-15903.
- Gepstein S, Grover A, Blumwald E.** 2008. Producing biopharmaceuticals in the desert: building an abiotic stress tolerance in plants for salt, heat, and drought. *Modern Biopharmaceuticals: Design, Development and Optimization*, 967-994.
- Hare PD, Cress WA, Van Staden J.** 1998. Dissecting the roles of osmolyte accumulation during stress. *Plant, Cell & Environment* **21**, 535-553.

- Hasanuzzaman M, Nahar K, Alam MM, Roychowdhury R, Fujita M.** 2013. Physiological, biochemical, and molecular mechanisms of heat stress tolerance in plants. *International Journal of Molecular Sciences* **14**, 9643-9684.
- Haughn G, Chaudhury A.** 2005. Genetic analysis of seed coat development in *Arabidopsis*. *Trends in Plant Science* **10**, 472-477.
- Hu M, Shi Z, Zhang Z, Zhang Y, Li H.** 2012. Effects of exogenous glucose on seed germination and antioxidant capacity in wheat seedlings under salt stress. *Plant growth regulation* **68**, 177-188.
- Jaime L, Mollá E, Fernández A, Martín-Cabrejas MA, López-Andréu FJ, Esteban RM.** 2002. Structural carbohydrate differences and potential source of dietary fiber of onion (*Allium cepa* L.) tissues. *Journal of Agricultural and Food Chemistry* **50**, 122-128.
- Jiang Y, Deyholos MK.** 2010. Transcriptome analysis of secondary-wall-enriched seed coat tissues of canola (*Brassica napus* L.). *Plant Cell Reports* **29**, 327-342.
- Keunen E, Peshev D, Vangronsveld J, Van Den Ende W, Cuypers A.** 2013. Plant sugars are crucial players in the oxidative challenge during abiotic stress: extending the traditional concept. *Plant, Cell & Environment* **36**, 1242-1255.
- Kim J-Y, Mahé A, Brangeon J, Prioul J-L.** 2000. A maize vacuolar invertase, IVR2, is induced by water stress. Organ/tissue specificity and diurnal modulation of expression. *Plant Physiology* **124**, 71-84.
- Maw BW, Butts CL, Purvis AC, Seebold K, Mullinix BG.** 2004. High-temperature continuous-flow curing of sweet onions. *Applied engineering in agriculture* **20**, 657.
- Miedes E, Vanholme R, Boerjan W, Molina A.** 2014. The role of the secondary cell wall in plant resistance to pathogens. *Frontiers in plant science* **5**, 358.
- Miron D, Schaffer AA.** 1991. Sucrose phosphate synthase, sucrose synthase, and invertase activities in developing fruit of *Lycopersicon esculentum* Mill. and the sucrose accumulating *Lycopersicon hirsutum* Humb. and Bonpl. *Plant Physiology* **95**, 623-627.
- O'hara LE, Paul MJ, Wingler A.** 2013. How do sugars regulate plant growth and development? New insight into the role of trehalose-6-phosphate. *Molecular plant* **6**, 261-274.
- Pattanagul W, Thitisaksakul M.** 2008. Effect of salinity stress on growth and carbohydrate metabolism in three rice (*Oryza sativa* L.) cultivars differing in salinity tolerance. *Journal of Experimental Biology* **46**, 736-742.

- Ramel F, Sulmon C, Bogard M, Couée I, Gouesbet G.** 2009. Differential patterns of reactive oxygen species and antioxidative mechanisms during atrazine injury and sucrose-induced tolerance in *Arabidopsis thaliana* plantlets. *BMC Plant Biology* **9**, 28.
- Rolland F, Baena-Gonzalez E, Sheen J.** 2006. Sugar sensing and signaling in plants: conserved and novel mechanisms. *Annu. Rev. Plant Biol.* **57**, 675-709.
- Rolland F, Moore B, Sheen J.** 2002. Sugar sensing and signaling in plants. *The plant cell* **14**, S185-S205.
- Salam BB, Malka SK, Zhu X, Gong H, Ziv C, Teper-Bamnlolker P, Ori N, Jiang J, Eshel D.** 2017. Etiolated stem branching is a result of systemic signaling associated with sucrose level. *Plant Physiology* **175**, 734-745.
- Singh M, Kumar J, Singh S, Singh VP, Prasad SM.** 2015. Roles of osmoprotectants in improving salinity and drought tolerance in plants: a review. *Reviews in Environmental Science and Bio/Technology* **14**, 407-426.
- Sumner JB, Graham V.** 1921. Dinitrosalicylic acid: a reagent for the estimation of sugar in normal and diabetic urine. *Journal of Biological Chemistry* **47**, 5-9.
- Vinocur B, Altman A.** 2005. Recent advances in engineering plant tolerance to abiotic stress: achievements and limitations. *Current opinion in biotechnology* **16**, 123-132.
- Werner RA, Buchmann N, Siegwolf RT, Kornexl BE, Gessler A.** 2011. Metabolic fluxes, carbon isotope fractionation and respiration—lessons to be learned from plant biochemistry. *New Phytologist* **191**, 10-15.
- Yancey PH.** 2005. Organic osmolytes as compatible, metabolic and counteracting cytoprotectants in high osmolarity and other stresses. *Journal of Experimental Biology* **208**, 2819-2830.
- Yuanyuan M, Yali Z, Jiang L, Hongbo S.** 2009. Roles of plant soluble sugars and their responses to plant cold stress. *African Journal of Biotechnology* **8**.
- Zhu X, Gong H, He Q, Zeng Z, Busse JS, Jin W, Bethke PC, Jiang J.** 2016. Silencing of vacuolar invertase and asparagine synthetase genes and its impact on acrylamide formation of fried potato products. *Plant biotechnology journal* **14**, 709-718.
- Zhu X, Richael C, Chamberlain P, Busse JS, Bussan AJ, Jiang J, Bethke PC.** 2014. Vacuolar invertase gene silencing in potato (*Solanum tuberosum* L.) improves processing quality by decreasing the frequency of sugar-end defects. *PloS one* **9**, e93381.



## Figure Legends

**Fig. 1.** Heat treatment induces differential changes in osmolarity and soluble sugar levels in the outer vs. inner scales of onion bulb. Detached onion scales were exposed to 6 days of heat treatment (33 °C, 98% RH). Data are averages of three experiments, each performed with five replicates per treatment. Error bars represent SE (n = 6). A single asterisk (\*) represent significant differences ( $P < 0.05$ ) between different onion scales among the same time point.

**Fig. 2.** Sugar feeding stabilizes tissue osmolarity and decreases water loss during heat treatment. (A) Osmolarity and (B) relative water content of detached onion scales during 6 days of heat treatment (33 °C, 98% RH). Outer scales were incubated in 600 mM sucrose, glucose or fructose solutions for 24 h at 14 °C, before the heat treatment. Data are averages of three experiments, each performed with five replicates per treatment. Error bars represent SE. Different uppercase letters indicate significant statistical difference ( $P < 0.05$ ) between different sugars among the same time point.

**Fig. 3.** Silencing *VInv* enhances desiccation of potato leaves during heat treatment. Leaves of RBK1, RBK27 and RBK46—*VInv*-silenced lines of potato cv. Russet Burbank—and wild type (WT) were exposed to 8 days of heat treatment (30 °C, 65% RH). (A) Phenotypic documentation, every 2 days, of 3 leaves from 3 plants representing each line. (B) Relative water content. Error bars represent  $\pm$  SE of three repeats, each with 10 leaves.

**Fig. 4.** Heat treatment induces accumulation of (A) *VInv* activity and (B) DM only in the outer scale of the onion bulb during 8 and 22 days of heat treatment (33 °C, 98% RH), respectively. Data are averages of three experiments, each performed with five replicates per treatment. Error bars represent SE.

**Fig. 5.** Heat map describing the expression profiles of genes related to sugar metabolism in the outer vs. inner scale. Genes related to (A) lignin synthesis, (B) cellulose synthesis, (C) glycolysis and (D) TCA cycle. Measurements were performed at 0, 24 and 48 h of heat treatment in the outer and inner scales.

**Fig. 6.** Proposed model for osmoprotection in onion scale in response to heat treatment. The suggested model is based on overrepresentation of the corresponding genes in the first outer and fifth inner scales, as presented in Fig. 5. PCD, programmed cell death.

Fig. 1

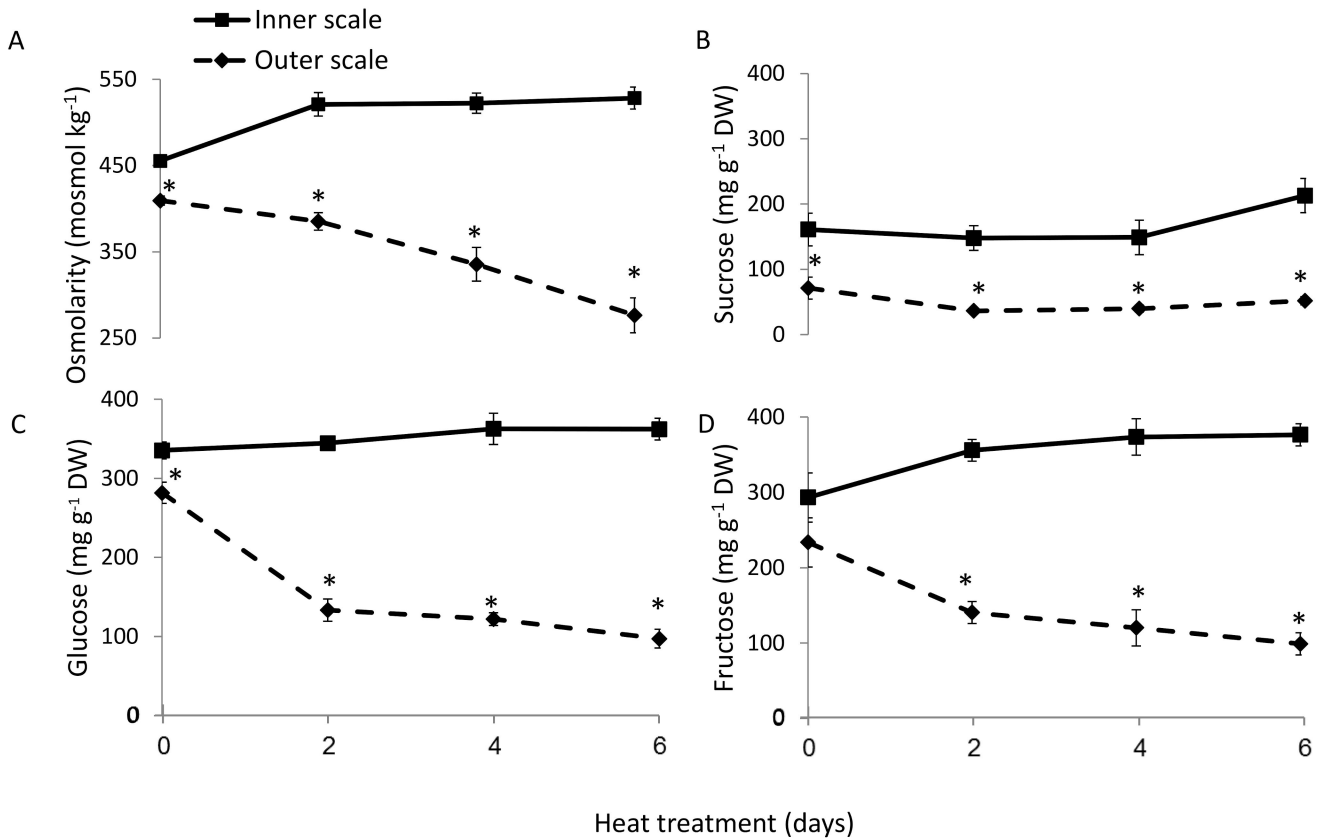

Fig. 2

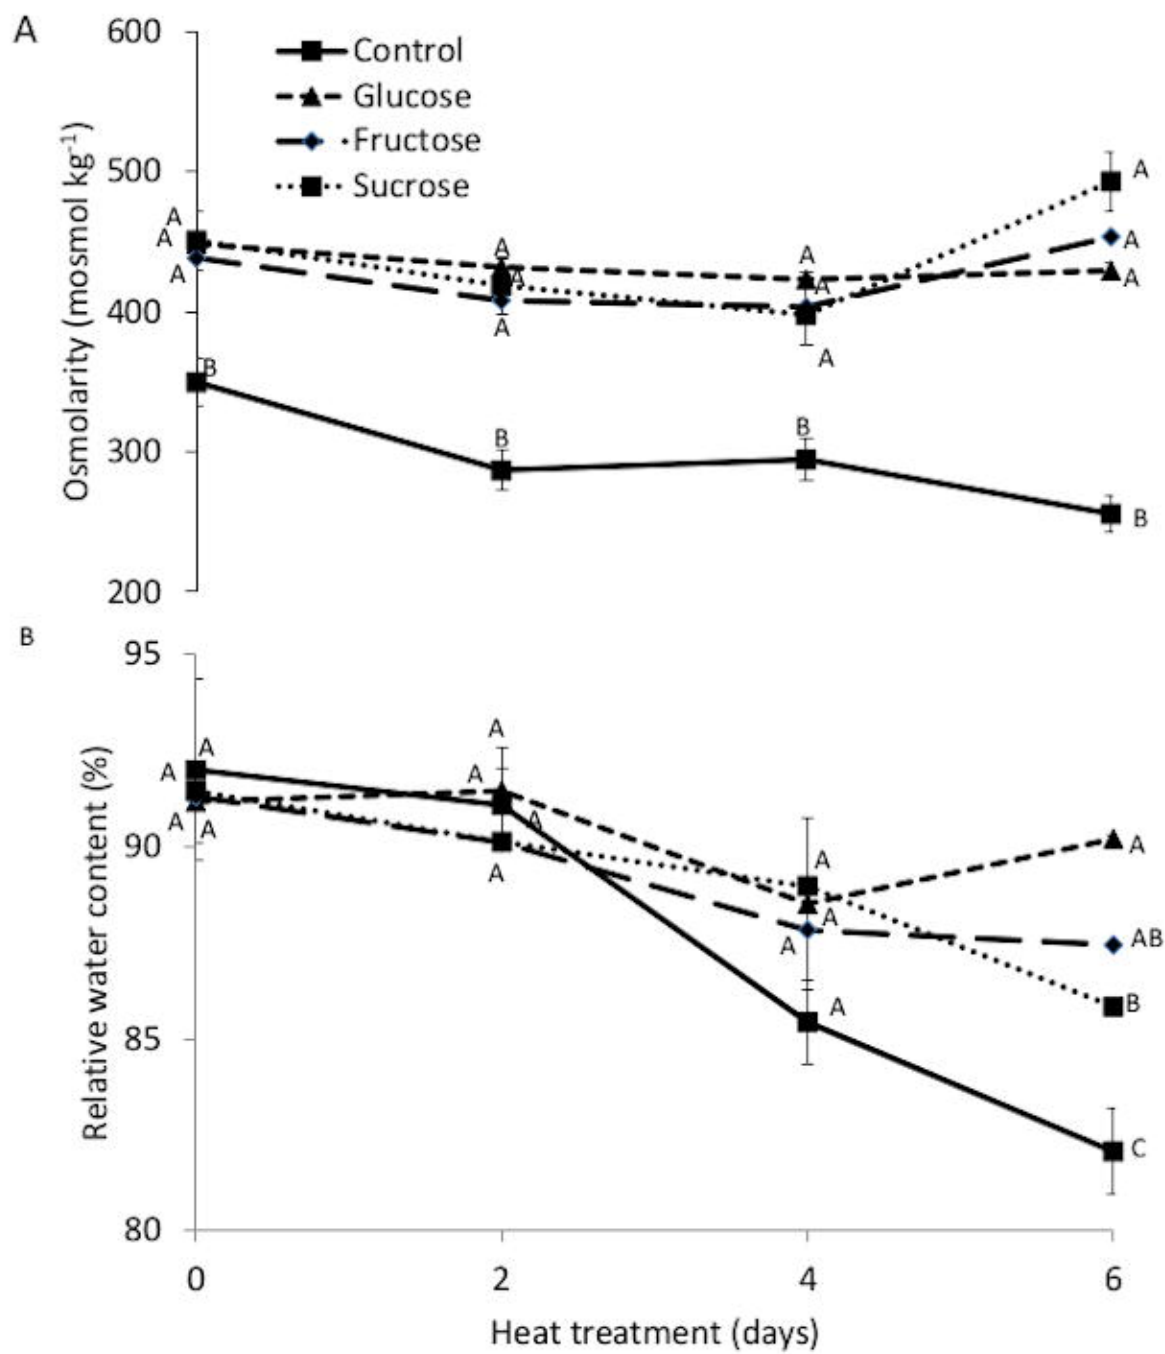

Fig. 3

A

WT  
BRK1  
BRK22  
BRK46

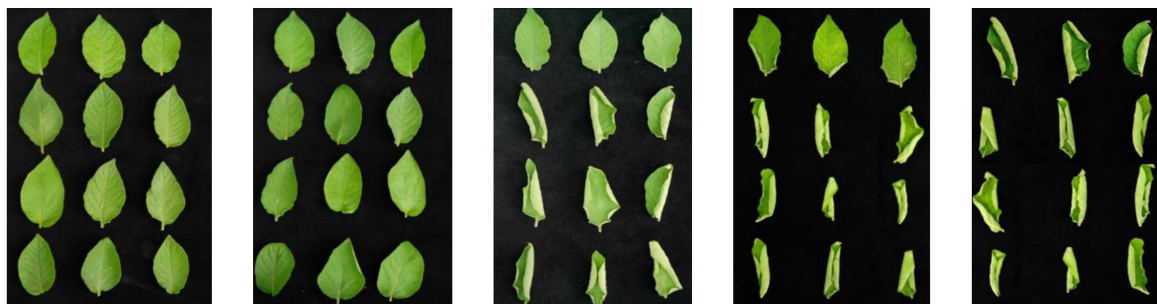

0 2 4 6 8  
Heat treatment (days)

B

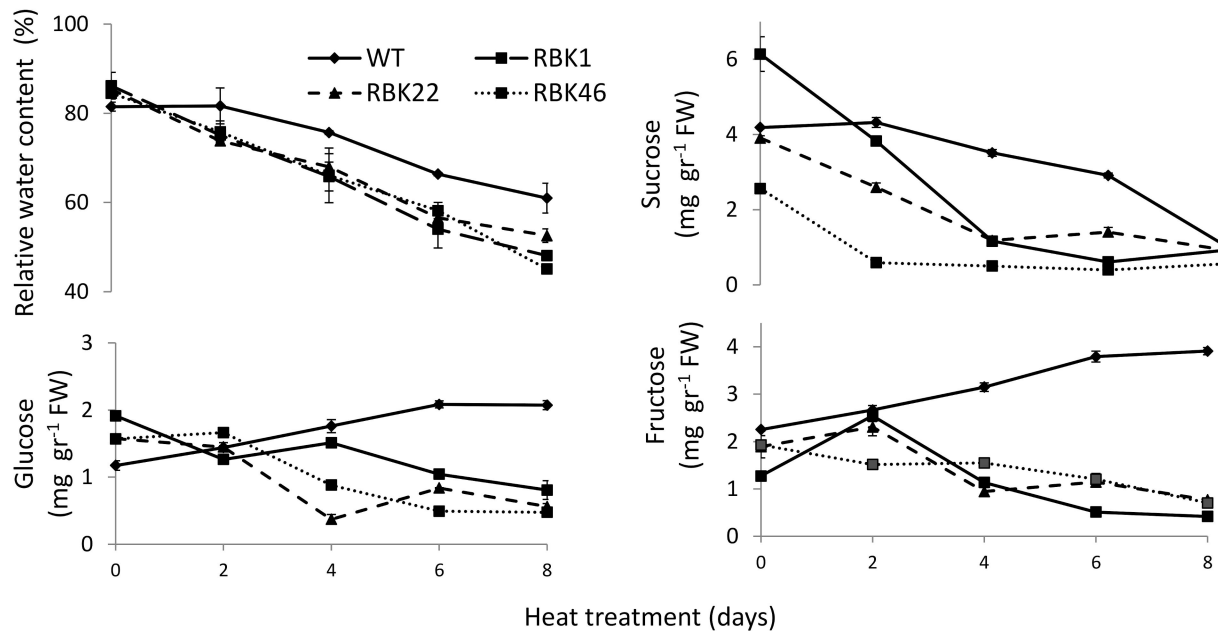

Fig. 4 A

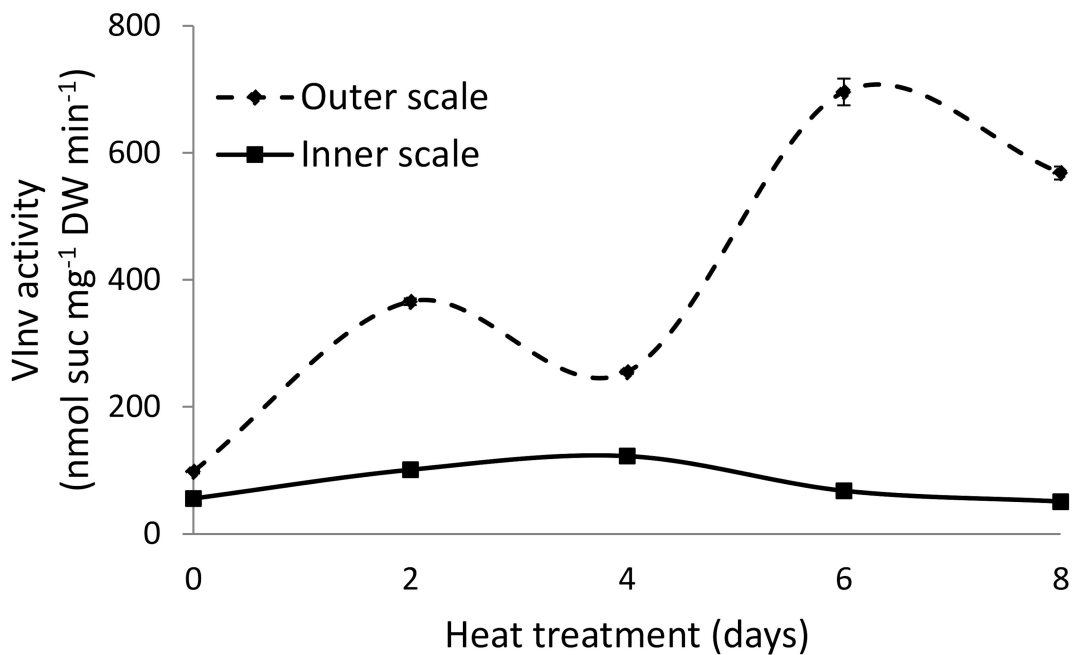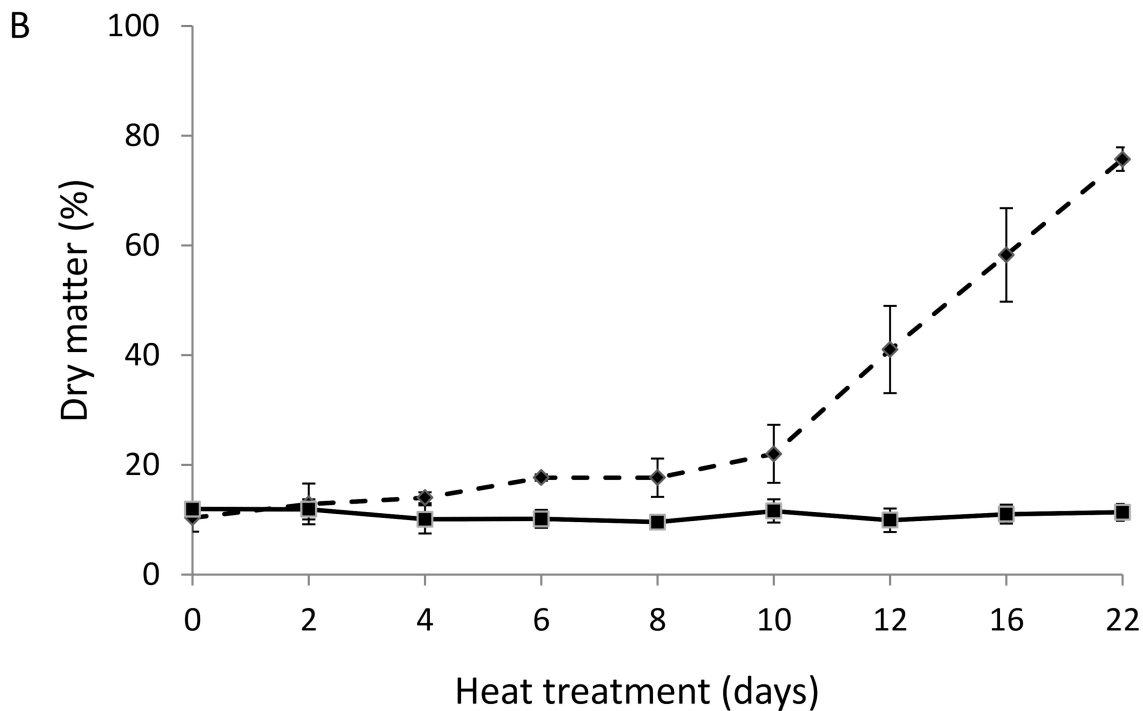

Fig. 5

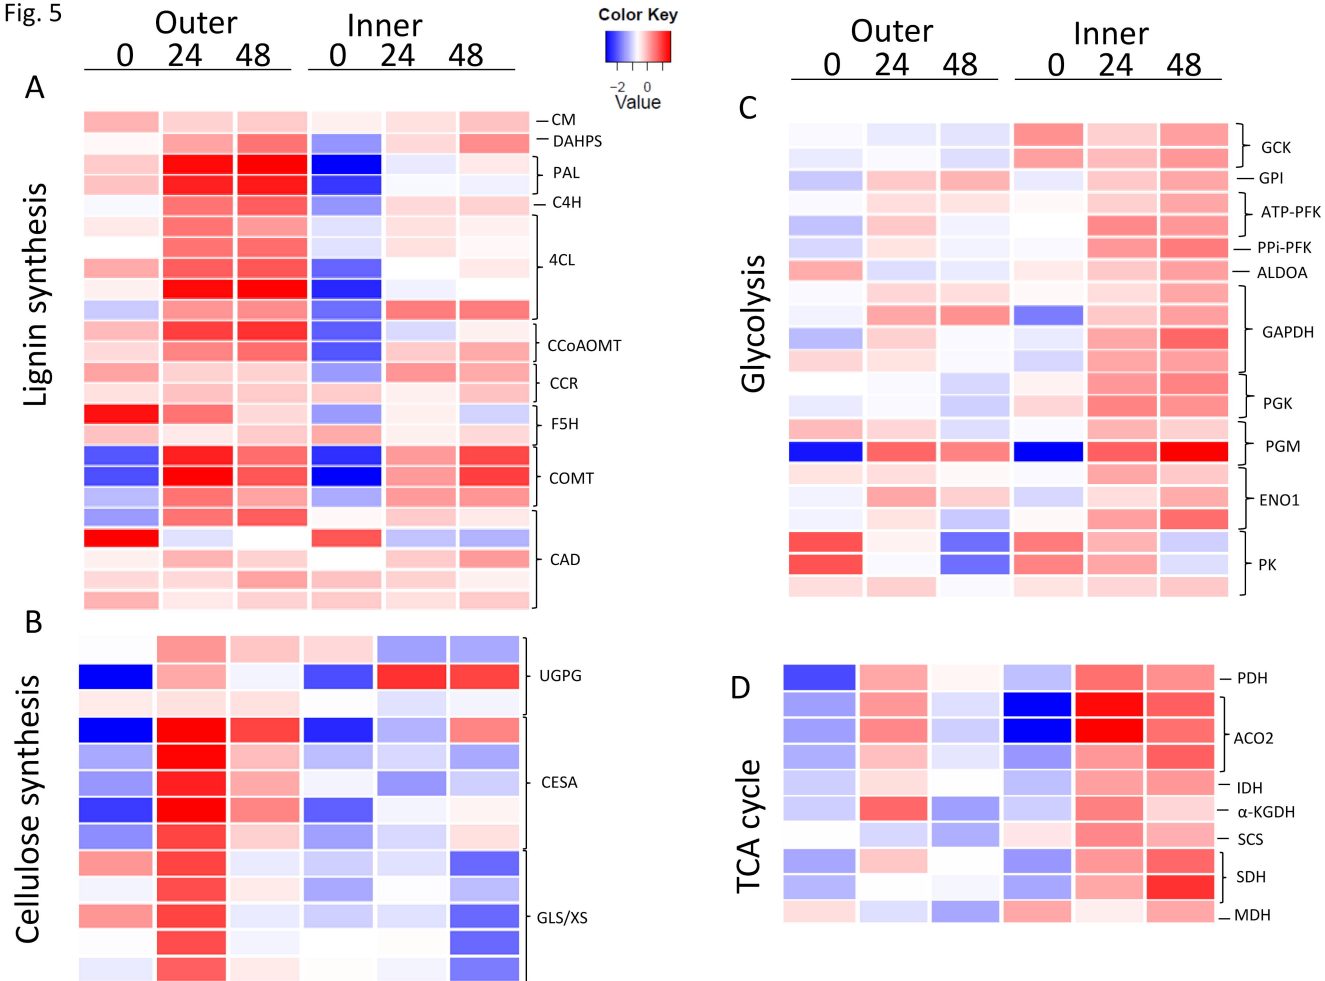

Fig. 6

Heat treatment

Outer scale

Inner scale

Oxidative stress

PCD response

Resistance response

Decrease in soluble sugars

Increase in soluble sugars

Water loss

Osmoprotection

Lignin and cellulose synthesis

High glycolysis and TCA cycle

Skin formation

Heat tolerance

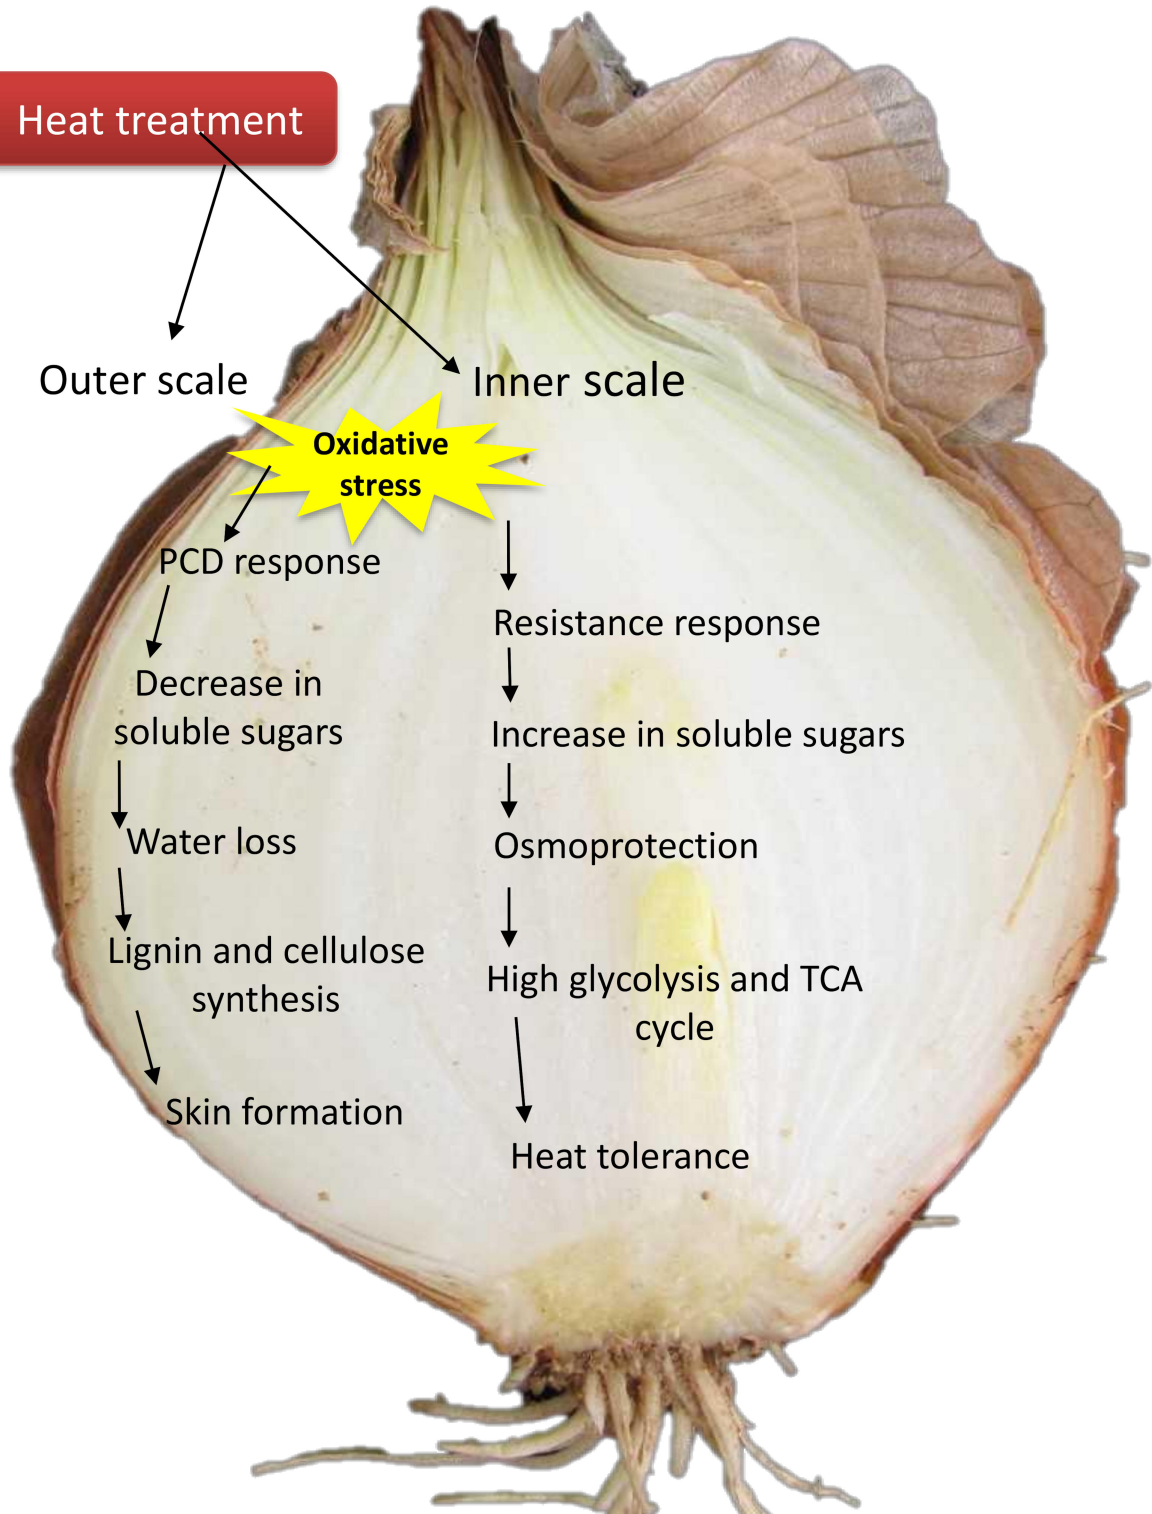

Source: https://www.biorxiv.org/content/10.1101/848572v1.full.pdf
